# Supplementary material
Source: Springer Nature journal article supplement (https://www.springermedizin.de/resource/supplementary/12985_2010_995_MOESM1_ESM.pdf/9608916)

A

**Negative sense RNA**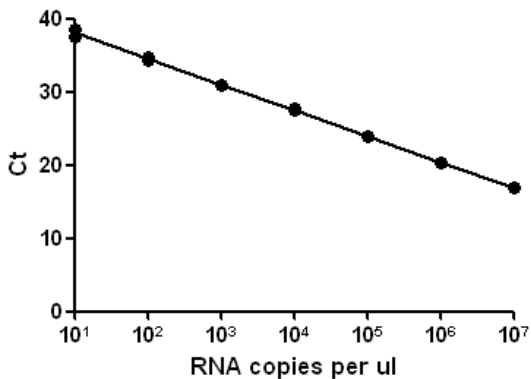

B

**Positive sense RNA**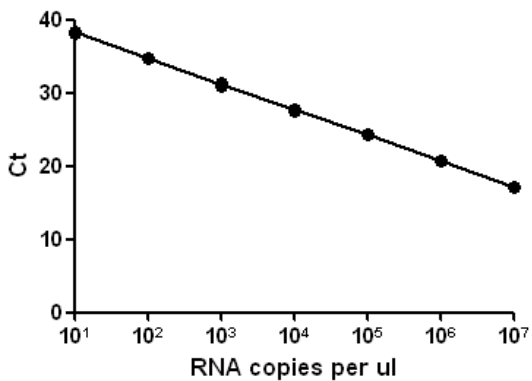

Supplement: MOESM1 [file 9608916]
